# Supplementary material for: Understanding Real-World Treatment Patterns and Clinical Outcomes among Metastatic Melanoma Patients in Alberta, Canada
Source: MDPI journal article supplement (doi:10.3390/curroncol30040317), 2023-04-13
Supplement: s1 [file s1]

**Supplementary Table S1.** Overall survival outcomes of metastatic melanoma patients (diagnosed between 2015–2018) by line of therapy stratified by disease type.

| Variable                   | Median Survival<br>(95% CI) | 1 Year Survival<br>(95% CI) | 2 Year Survival<br>(95% CI) |
|----------------------------|-----------------------------|-----------------------------|-----------------------------|
| <b>1L Systemic therapy</b> |                             |                             |                             |
| De novo                    | 15.29 (8.84–NA)             | 0.525 (0.424–0.651)         | 0.445 (0.343–0.577)         |
| Recurrent                  | 25.22 (20.58–38.53)         | 0.707 (0.645–0.776)         | 0.522 (0.451–0.604)         |
| <b>2L Systemic therapy</b> |                             |                             |                             |
| De novo                    | 10.62 (4.41–NA)             | 0.466 (0.298–0.728)         | 0.266 (0.122–0.581)         |
| Recurrent                  | 10.16 (5.95–16.37)          | 0.465 (0.352–0.614)         | 0.263–0.163–0.425)          |

**Supplementary Table S2.** Cancer-specific survival outcomes of metastatic melanoma patients (diagnosed between 2015–2018) by treatment type and line of therapy.

| Variable                             | Median Survival<br>(95% CI) | 1 Year Survival<br>(95% CI) | 2 Year Survival<br>(95% CI) |
|--------------------------------------|-----------------------------|-----------------------------|-----------------------------|
| <b>1L Systemic therapy</b>           | 28.50 (22.22–NA)            | 0.689 (0.634–0.749)         | 0.547 (0.486–0.616)         |
| Ipilimumab/Ipilimumab +<br>Nivolumab | NA (NA–NA)                  | 0.754 (0.654–0.871)         | 0.666 (0.551–0.804)         |
| PD-1                                 | 38.96 (22.22–NA)            | 0.764 (0.689–0.848)         | 0.590 (0.498–0.698)         |
| Targeted Therapy                     | 15.29 (9.93–25.22)          | 0.536 (0.437–0.658)         | 0.396 (0.299–0.524)         |
| <b>2L Systemic therapy</b>           | 10.62 (7.86–18.94)          | 0.499 (0.398–0.625)         | 0.313 (0.215–0.457)         |
| Ipilimumab/Ipilimumab +<br>Nivolumab | 8.81 (3.78–NA)              | 0.429 (0.241–0.762)         | 0.286 (0.127–0.641)         |
| PD-1                                 | 12.07 (4.90–NA)             | 0.507 (0.361–0.713)         | 0.245 (0.119–0.502)         |
| Targeted Therapy                     | 19.46 (8.32–NA)             | 0.564 (0.403–0.789)         | 0.452 (0.286–0.715)         |
| <b>3L Systemic therapy</b>           | 11.24 (5.65–NA)             | 0.473 (0.295–0.759)         | 0.249 (0.101–0.609)         |
| PD-1                                 | 12.76 (6.48–NA)             | 0.533 (0.280–1.000)         | 0.400 (0.170–0.943)         |
| Targeted Therapy                     | 5.65 (3.75–NA)              | 0.360 (0.150–0.865)         | NA                          |
